# Supplementary material for: Barriers to human papillomavirus vaccine uptake: role of state religiosity and healthcare professionals’ participation in a state vaccine program
Source: PubMed Central journal article supplement (PMC10575682; doi:10.1093/jncics/pkad068), 2023-09-12

Supplementary Figure 1: HPV vaccine initiation by state religiosity: National Immunization survey–Teen 2020

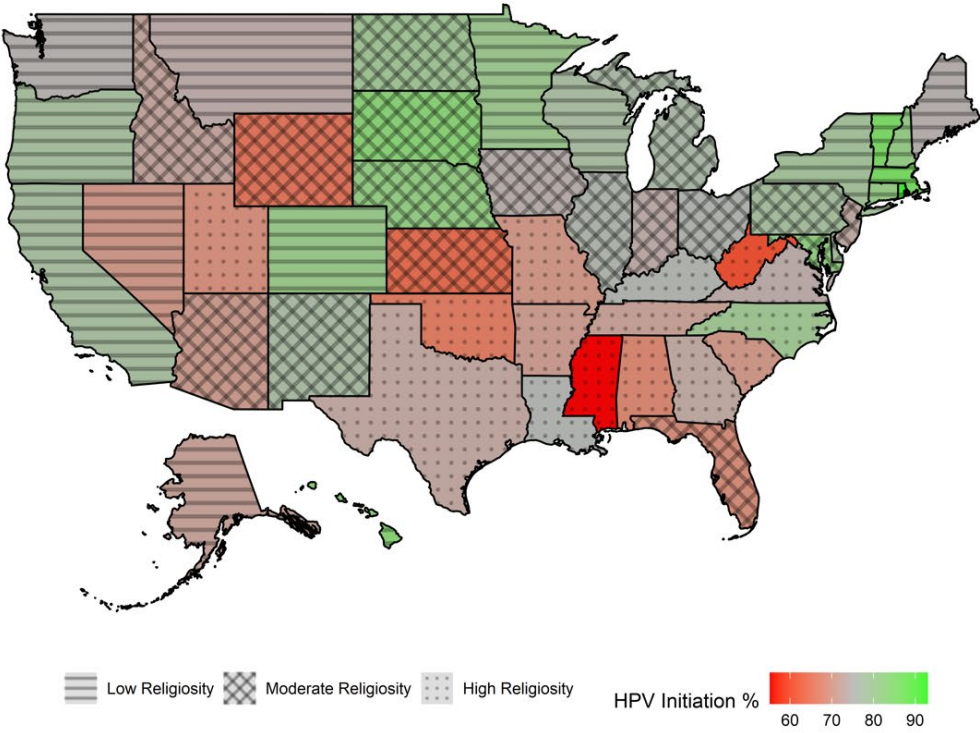

Supplementary Figure 2: HPV vaccine Up-To-Date (UTD) by state religiosity: National Immunization Survey–Teen 2020

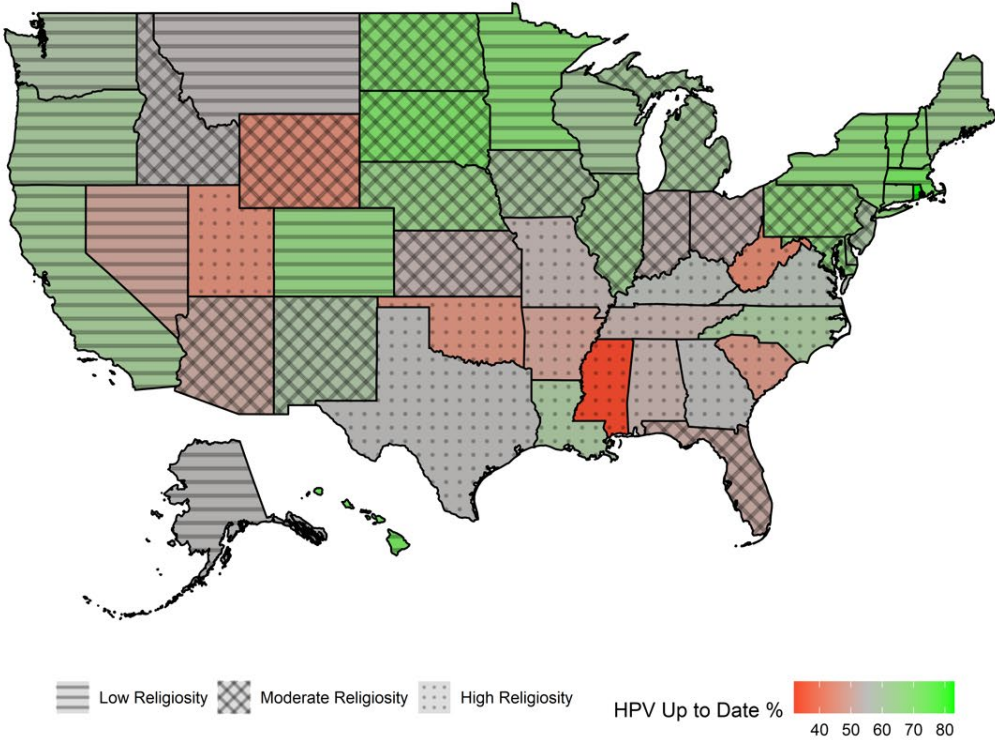

Supplement: pkad068_supplementary_data.pdf [file pkad068_supplementary_data.pdf]
